# Supplementary material for: Comparative transcriptome reveals the mechanism of mink fur development and color formation
Source: Research Square preprint supplement (doi:10.21203/rs.3.rs-1556708/v1), 2022-04-18
Supplement: Supplementary file 1 [file 050c02548740813f3b78b4f1.xlsx]

## Sheet: align_region
Table S2 Reads were mapped to genomic regions for statistics
sample	exon	intron	intergenic
AB1	3469632489(53.5659%)	447004000(6.9011%)	2560684122(39.5331%)
AB2	3290071968(53.6222%)	524449481(8.5476%)	2321132136(37.8302%)
AB3	3400512131(52.2659%)	448601643(6.895%)	2657066687(40.8391%)
AW1	3310001124(52.3329%)	521778440(8.2496%)	2493117870(39.4175%)
AW2	3360421524(49.2048%)	569528937(8.3393%)	2899502161(42.4558%)
AW3	3284919778(50.2976%)	532014875(8.146%)	2714026284(41.5563%)
TB1	3542181130(57.1261%)	555080764(8.952%)	2103370413(33.9219%)
TB2	3775779604(56.8518%)	568592898(8.5613%)	2297070467(34.5869%)
TB3	3388642342(52.7675%)	586566094(9.1339%)	2446629068(38.0986%)
TW1	3584600349(57.1298%)	554777511(8.8418%)	2135101188(34.0283%)
TW2	3711844624(58.6609%)	552761377(8.7357%)	2063024031(32.6034%)
TW3	3832379376(57.9085%)	614662202(9.2877%)	2170948337(32.8037%)
