# Supplementary material for: Comparative transcriptome reveals the mechanism of mink fur development and color formation
Source: Research Square preprint supplement (doi:10.21203/rs.3.rs-1556708/v1), 2022-04-18
Supplement: Supplementary file 2 [file 90ff688682af451af94dfbee.xlsx]

## Sheet: ABvsTB_all_KEGGenrich
Table S6 Intersection of signal pathway differentially expressed genes in different age groups of two fur colors
KEGGID	Description
cfa00350	Tyrosine metabolism
cfa00590	Arachidonic acid metabolism
cfa00591	Linoleic acid metabolism
cfa00592	alpha-Linolenic acid metabolism
cfa00982	Drug metabolism - cytochrome P450
cfa01040	Biosynthesis of unsaturated fatty acids
cfa03320	PPAR signaling pathway
cfa04014	Ras signaling pathway
cfa04015	Rap1 signaling pathway
cfa04024	cAMP signaling pathway
cfa04060	Cytokine-cytokine receptor interaction
cfa04110	Cell cycle
cfa04151	PI3K-Akt signaling pathway
cfa04270	Vascular smooth muscle contraction
cfa04510	Focal adhesion
cfa04512	ECM-receptor interaction
cfa04514	Cell adhesion molecules
cfa04550	Signaling pathways regulating pluripotency of stem cells
cfa04610	Complement and coagulation cascades
cfa04630	JAK-STAT signaling pathway
cfa04640	Hematopoietic cell lineage
cfa04915	Estrogen signaling pathway
cfa04916	Melanogenesis
cfa04923	Regulation of lipolysis in adipocytes
cfa04933	AGE-RAGE signaling pathway in diabetic complications
cfa04960	Aldosterone-regulated sodium reabsorption
cfa04974	Protein digestion and absorption
cfa05144	Malaria
cfa05150	Staphylococcus aureus infection
cfa05200	Pathways in cancer
cfa05205	Proteoglycans in cancer
cfa05206	MicroRNAs in cancer
cfa05217	Basal cell carcinoma
cfa05340	Primary immunodeficiency
cfa05418	Fluid shear stress and atherosclerosis
