# Supplementary material for: Comparative transcriptome reveals the mechanism of mink fur development and color formation
Source: Research Square preprint supplement (doi:10.21203/rs.3.rs-1556708/v1), 2022-04-18
Supplement: Supplementary file 3 [file a250e31d0d926110bf2a2786.xlsx]

## Sheet: align_pct
Table S1 Statistical results of sample and reference genome alignment
sample	total_reads	total_map	unique_map	multi_map	read1_map	read2_map	positive_map	negative_map	splice_map	unsplice_map	proper_map
AB1	45190978	43283142(95.78%)	41450726(91.72%)	1832416(4.05%)	20757680(45.93%)	20693046(45.79%)	20720723(45.85%)	20730003(45.87%)	17573694(38.89%)	23877032(52.84%)	40259896(89.09%)
AB2	42895824	40997081(95.57%)	39108370(91.17%)	1888711(4.4%)	19574993(45.63%)	19533377(45.54%)	19539872(45.55%)	19568498(45.62%)	17044191(39.73%)	22064179(51.44%)	37931452(88.43%)
AB3	45357284	43471509(95.84%)	41571529(91.65%)	1899980(4.19%)	20806854(45.87%)	20764675(45.78%)	20776672(45.81%)	20794857(45.85%)	17492572(38.57%)	24078957(53.09%)	40358100(88.98%)
AW1	44155634	42268903(95.73%)	40614975(91.98%)	1653928(3.75%)	20329081(46.04%)	20285894(45.94%)	20304780(45.98%)	20310195(46.0%)	16431948(37.21%)	24183027(54.77%)	39383190(89.19%)
AW2	47408254	45618584(96.22%)	43645302(92.06%)	1973282(4.16%)	21837186(46.06%)	21808116(46.0%)	21817831(46.02%)	21827471(46.04%)	16885847(35.62%)	26759455(56.44%)	42490382(89.63%)
AW3	46088186	43641964(94.69%)	41441763(89.92%)	2200201(4.77%)	20739310(45.0%)	20702453(44.92%)	20723531(44.96%)	20718232(44.95%)	16501715(35.8%)	24940048(54.11%)	40076554(86.96%)
TB1	42882980	41418306(96.58%)	39781341(92.77%)	1636965(3.82%)	19914761(46.44%)	19866580(46.33%)	19872339(46.34%)	19909002(46.43%)	17411817(40.6%)	22369524(52.16%)	38677250(90.19%)
TB2	46084054	44368122(96.28%)	42332436(91.86%)	2035686(4.42%)	21198889(46.0%)	21133547(45.86%)	21152261(45.9%)	21180175(45.96%)	18617700(40.4%)	23714736(51.46%)	40941170(88.84%)
TB3	44685668	42911530(96.03%)	40887142(91.5%)	2024388(4.53%)	20486347(45.85%)	20400795(45.65%)	20430113(45.72%)	20457029(45.78%)	16977310(37.99%)	23909832(53.51%)	39378370(88.12%)
TW1	43591538	41917407(96.16%)	39766055(91.22%)	2151352(4.94%)	19912987(45.68%)	19853068(45.54%)	19861367(45.56%)	19904688(45.66%)	17649576(40.49%)	22116479(50.74%)	38559150(88.46%)
TW2	43975908	42278733(96.14%)	40587885(92.3%)	1690848(3.84%)	20325374(46.22%)	20262511(46.08%)	20273486(46.1%)	20314399(46.19%)	18178984(41.34%)	22408901(50.96%)	39340146(89.46%)
TW3	45858686	44217223(96.42%)	42369292(92.39%)	1847931(4.03%)	21216246(46.26%)	21153046(46.13%)	21166674(46.16%)	21202618(46.23%)	18709931(40.8%)	23659361(51.59%)	41100898(89.63%)
